# Supplementary material for: Neural network assisted Kalman filter for INS/UWB integrated seamless quadrotor localization
Source: PeerJ Comput Sci. 2021 Jul 14;7:e630. doi: 10.7717/peerj-cs.630 (PMC8293925; doi:10.7717/peerj-cs.630)
Supplement: Supplemental Information 2 [file peerj-cs-07-630-s002.xlsx]

## Sheet: Sheet1
0	0	0
-2.82836e-05	1.97135e-05	0
-8.72381e-05	5.18422e-05	0
-0.000184733	9.48563e-05	0
-0.000335445	0.000149526	0
-0.000543328	0.000218074	0
-0.000793621	0.000290217	0
-0.00108125	0.000373941	0
-0.00140653	0.000471012	0
-0.00177344	0.000587837	0
-0.0022057	0.000720067	0
-0.0026834	0.000858728	0
-0.00319297	0.00102212	0
-0.00373772	0.00116374	0
-0.00433009	0.00128197	0
-0.00496531	0.00141539	0
-0.00561636	0.00153591	0
-0.0062778	0.00165199	0
-0.00696078	0.00177385	0
-0.00766918	0.00189851	0
-0.00839625	0.00202656	0
-0.00914631	0.00215737	0
-0.00992205	0.00229271	0
-0.0107237	0.00243411	0
-0.011555	0.00258271	0
-0.0124194	0.00274106	0
-0.0133057	0.00290302	0
-0.0142067	0.00306365	0
-0.0151214	0.00321317	0
-0.0160398	0.00336185	0
-0.0169885	0.00351993	0
-0.0179772	0.00368615	0
-0.0189867	0.00386191	0
-0.0200132	0.00403834	0
-0.0210549	0.00422039	0
-0.0221252	0.0044081	0
-0.0232244	0.00460397	0
-0.0243447	0.0048048	0
-0.0254844	0.00501014	0
-0.0266487	0.00522281	0
-0.0278404	0.00544208	0
-0.0290515	0.00566893	0
-0.0302851	0.00590124	0
-0.0315485	0.00614362	0
-0.0328162	0.00641205	0
-0.0340444	0.00672745	0
-0.0353094	0.00704233	0
-0.0365912	0.00735775	0
-0.037952	0.00760575	0
-0.0393416	0.00786073	0
-0.0407093	0.00812204	0
-0.0420346	0.00837754	0
-0.0433687	0.00863163	0
-0.0447369	0.00888711	0
-0.0461854	0.00914407	0
-0.0476984	0.00941754	0
-0.0492679	0.00969145	0
-0.0508726	0.00993922	0
-0.0525003	0.0101896	0
-0.054162	0.0104565	0
-0.0558737	0.0107583	0
-0.057622	0.0110896	0
-0.0593911	0.0114294	0
-0.0611858	0.0117775	0
-0.0630164	0.0121343	0
-0.064865	0.0124946	0
-0.0667332	0.0128584	0
-0.068625	0.0132222	0
-0.0705594	0.0135974	0
-0.0725262	0.0139695	0
-0.0745091	0.0143501	0
-0.0765014	0.0147341	0
-0.0785176	0.0151144	0
-0.0805634	0.0154906	0
-0.0826306	0.0158611	0
-0.0847263	0.0162204	0
-0.0868483	0.0165967	0
-0.0889702	0.0169639	0
-0.0911038	0.0173399	0
-0.0932716	0.0177121	0
-0.0954686	0.0180832	0
-0.0976916	0.0184549	0
-0.0999464	0.0188332	0
-0.10223	0.0192224	0
-0.104544	0.019617	0
-0.106901	0.0200185	0
-0.109302	0.0204241	0
-0.11174	0.0208325	0
-0.114213	0.0212487	0
-0.116722	0.021668	0
-0.119263	0.0220935	0
-0.121841	0.0225267	0
-0.124448	0.022965	0
-0.127087	0.0234029	0
-0.129755	0.0238468	0
-0.132454	0.0242895	0
-0.135187	0.0247346	0
-0.137957	0.0251801	0
-0.140759	0.0256305	0
-0.143589	0.0260744	0
-0.14645	0.0265166	0
-0.149339	0.0269612	0
-0.152262	0.0274079	0
-0.15522	0.0278629	0
-0.158213	0.0283265	0
-0.161241	0.0287942	0
-0.164302	0.0292608	0
-0.167403	0.0297231	0
-0.170535	0.0301775	0
-0.173701	0.0306305	0
-0.176905	0.031083	0
-0.180151	0.0315385	0
-0.183433	0.0319973	0
-0.18676	0.0324596	0
-0.190125	0.0329295	0
-0.19353	0.0334023	0
-0.196976	0.0338806	0
-0.200462	0.0343612	0
-0.203994	0.0348424	0
-0.207568	0.0353297	0
-0.211185	0.0358121	0
-0.214839	0.036293	0
-0.218536	0.0367789	0
-0.222276	0.0372596	0
-0.226059	0.03773	0
-0.229884	0.038198	0
-0.233752	0.0386791	0
-0.237672	0.0391786	0
-0.241643	0.0396872	0
-0.24566	0.0402024	0
-0.24973	0.0407188	0
-0.253862	0.0412444	0
-0.258059	0.0417568	0
-0.262307	0.0422623	0
-0.26661	0.0427515	0
-0.270958	0.0432045	0
-0.275342	0.0436378	0
-0.279764	0.0440824	0
-0.284211	0.0445335	0
-0.288675	0.0449789	0
-0.293173	0.0454308	0
-0.29772	0.0458887	0
-0.302309	0.0463551	0
-0.306944	0.0468191	0
-0.311624	0.0472797	0
-0.316344	0.0477414	0
-0.321111	0.0482033	0
-0.325926	0.0486778	0
-0.330797	0.0491632	0
-0.335718	0.0496525	0
-0.340694	0.0501322	0
-0.345724	0.050612	0
-0.350814	0.0511007	0
-0.355973	0.0515941	0
-0.361183	0.0520903	0
-0.366447	0.0525791	0
-0.371766	0.0530631	0
-0.377146	0.0535488	0
-0.382584	0.0540306	0
-0.38809	0.0545219	0
-0.393669	0.0550137	0
-0.399322	0.0555005	0
-0.405048	0.0559901	0
-0.410837	0.0564734	0
-0.416677	0.056958	0
-0.422588	0.0574603	0
-0.428576	0.0579737	0
-0.434652	0.0584884	0
-0.440799	0.0590131	0
-0.447017	0.059552	0
-0.453312	0.060096	0
-0.459679	0.0606413	0
-0.466113	0.0611855	0
-0.472626	0.0617333	0
-0.479205	0.0622771	0
-0.485852	0.0628184	0
-0.492575	0.0633719	0
-0.499376	0.0639317	0
-0.506236	0.0644905	0
-0.513158	0.065044	0
-0.520147	0.0656004	0
-0.527215	0.0661689	0
-0.534357	0.0667352	0
-0.541556	0.067304	0
-0.548823	0.0678734	0
-0.556159	0.0684369	0
-0.563552	0.0690063	0
-0.571007	0.0695631	0
-0.578511	0.0701178	0
-0.58607	0.0706766	0
-0.593685	0.0712329	0
-0.601351	0.0717794	0
-0.609069	0.0723373	0
-0.616835	0.072896	0
-0.624655	0.0734664	0
-0.632533	0.0740504	0
-0.640457	0.0746339	0
-0.64843	0.0752286	0
-0.656438	0.0758304	0
-0.664492	0.0764414	0
-0.672588	0.077045	0
-0.680712	0.0776356	0
-0.688852	0.0782118	0
-0.697007	0.0787933	0
-0.705199	0.0793934	0
-0.713425	0.0800081	0
-0.721676	0.0806276	0
-0.729946	0.0812476	0
-0.738251	0.081879	0
-0.746573	0.0825213	0
-0.754921	0.0831657	0
-0.763301	0.0838098	0
-0.771708	0.0844474	0
-0.780144	0.0850827	0
-0.788604	0.0857173	0
-0.797078	0.0863549	0
-0.805572	0.0869941	0
-0.814093	0.0876293	0
-0.822638	0.0882561	0
-0.831211	0.088875	0
-0.839806	0.0894896	0
-0.848429	0.0900994	0
-0.857077	0.0907083	0
-0.865759	0.091323	0
-0.874475	0.0919476	0
-0.88322	0.0925642	0
-0.891989	0.0931813	0
-0.900786	0.0938094	0
-0.909627	0.0944426	0
-0.918494	0.0950611	0
-0.927372	0.0956636	0
-0.936288	0.096288	0
-0.945264	0.0969243	0
-0.954272	0.0975464	0
-0.963297	0.0981847	0
-0.972339	0.0988431	0
-0.981413	0.0994977	0
-0.990527	0.100159	0
-0.999674	0.100833	0
-1.00885	0.101506	0
-1.01804	0.10218	0
-1.02724	0.102861	0
-1.03647	0.103549	0
-1.04573	0.104236	0
-1.05502	0.104926	0
-1.06428	0.105633	0
-1.07351	0.10636	0
-1.08273	0.107085	0
-1.09198	0.107779	0
-1.10125	0.108451	0
-1.1105	0.109127	0
-1.11971	0.109823	0
-1.12888	0.110514	0
-1.13805	0.111181	0
-1.14723	0.111834	0
-1.15639	0.112493	0
-1.16551	0.113164	0
-1.17459	0.113834	0
-1.18364	0.114496	0
-1.19264	0.115175	0
-1.20159	0.11585	0
-1.2105	0.116497	0
-1.21938	0.117115	0
-1.22825	0.117743	0
-1.23706	0.118395	0
-1.24581	0.119046	0
-1.25452	0.11967	0
-1.26319	0.120278	0
-1.27182	0.120888	0
-1.2804	0.12152	0
-1.28889	0.122156	0
-1.29733	0.12278	0
-1.30572	0.123385	0
-1.31406	0.12399	0
-1.32235	0.124611	0
-1.33057	0.125231	0
-1.33872	0.125827	0
-1.34682	0.126427	0
-1.35487	0.127032	0
-1.36289	0.12762	0
-1.37086	0.128206	0
-1.37878	0.128792	0
-1.38664	0.129376	0
-1.39445	0.129953	0
-1.40223	0.130521	0
-1.40997	0.131086	0
-1.41768	0.131645	0
-1.42535	0.132218	0
-1.43296	0.132792	0
-1.44055	0.13336	0
-1.44811	0.133926	0
-1.45564	0.134486	0
-1.46316	0.13504	0
-1.47063	0.135582	0
-1.47805	0.136114	0
-1.48543	0.136659	0
-1.49278	0.137206	0
-1.5001	0.137749	0
-1.50739	0.138284	0
-1.51465	0.138814	0
-1.52186	0.139357	0
-1.529	0.139915	0
-1.53609	0.140476	0
-1.54315	0.141045	0
-1.55019	0.141607	0
-1.55721	0.142165	0
-1.56418	0.142731	0
-1.57111	0.143295	0
-1.57801	0.143858	0
-1.58487	0.144427	0
-1.59172	0.144992	0
-1.59854	0.145551	0
-1.6053	0.146115	0
-1.61203	0.146688	0
-1.61873	0.147252	0
-1.62541	0.147819	0
-1.63208	0.148391	0
-1.63875	0.148957	0
-1.6454	0.149506	0
-1.65202	0.150046	0
-1.65861	0.150588	0
-1.66518	0.151135	0
-1.67175	0.151666	0
-1.67831	0.15217	0
-1.68484	0.152676	0
-1.69135	0.153176	0
-1.69784	0.153656	0
-1.70433	0.154133	0
-1.71081	0.154596	0
-1.71728	0.155028	0
-1.72372	0.155454	0
-1.73011	0.155902	0
-1.73649	0.156368	0
-1.74285	0.156826	0
-1.74919	0.157267	0
-1.75552	0.157702	0
-1.76183	0.158145	0
-1.7681	0.158619	0
-1.77434	0.159108	0
-1.78055	0.159573	0
-1.78673	0.160032	0
-1.7929	0.160532	0
-1.79904	0.161028	0
-1.80515	0.161523	0
-1.8112	0.16205	0
-1.81722	0.162557	0
-1.82323	0.163048	0
-1.82921	0.163535	0
-1.83513	0.164033	0
-1.84098	0.164523	0
-1.84678	0.16501	0
-1.85255	0.165507	0
-1.85832	0.166027	0
-1.86406	0.166562	0
-1.86975	0.167101	0
-1.87539	0.167629	0
-1.88097	0.168149	0
-1.88653	0.168674	0
-1.89204	0.1692	0
-1.89749	0.169729	0
-1.90286	0.170271	0
-1.90815	0.170797	0
-1.91339	0.171312	0
-1.91855	0.171867	0
-1.92363	0.172424	0
-1.92863	0.17299	0
-1.93357	0.173575	0
-1.93846	0.17417	0
-1.94329	0.174762	0
-1.94806	0.175355	0
-1.95277	0.175949	0
-1.95744	0.176548	0
-1.96208	0.177152	0
-1.96667	0.177761	0
-1.97121	0.17837	0
-1.97568	0.178977	0
-1.98013	0.179597	0
-1.98451	0.180223	0
-1.9888	0.180841	0
-1.99304	0.181458	0
-1.99721	0.182081	0
-2.00131	0.182708	0
-2.00536	0.183342	0
-2.00933	0.183985	0
-2.01322	0.184635	0
-2.01701	0.185294	0
-2.02073	0.185961	0
-2.02436	0.186643	0
-2.02793	0.187336	0
-2.03141	0.188034	0
-2.03481	0.188741	0
-2.03811	0.189454	0
-2.04133	0.190169	0
-2.04447	0.19089	0
-2.04752	0.191616	0
-2.05047	0.19234	0
-2.05332	0.193066	0
-2.05608	0.193794	0
-2.05875	0.194525	0
-2.06132	0.195263	0
-2.06379	0.196008	0
-2.06616	0.196759	0
-2.06844	0.197526	0
-2.07065	0.198308	0
-2.07277	0.199099	0
-2.07479	0.199896	0
-2.07674	0.200702	0
-2.07862	0.201524	0
-2.08044	0.202358	0
-2.08217	0.203203	0
-2.08386	0.204056	0
-2.08549	0.204919	0
-2.08709	0.2058	0
-2.08866	0.206695	0
-2.09018	0.207596	0
-2.09167	0.208503	0
-2.09311	0.209414	0
-2.09451	0.210325	0
-2.09588	0.211268	0
-2.09718	0.212215	0
-2.09841	0.213144	0
-2.09958	0.214055	0
-2.10069	0.214945	0
-2.10175	0.215829	0
-2.10277	0.2167	0
-2.10374	0.217574	0
-2.10468	0.218453	0
-2.10558	0.219337	0
-2.10647	0.220221	0
-2.10733	0.221107	0
-2.10816	0.222001	0
-2.10896	0.222905	0
-2.10976	0.2238	0
-2.11053	0.224701	0
-2.11127	0.225609	0
-2.11199	0.22652	0
-2.11271	0.227437	0
-2.1134	0.228355	0
-2.11406	0.229262	0
-2.11473	0.230169	0
-2.1154	0.231081	0
-2.11607	0.232006	0
-2.11672	0.232933	0
-2.11735	0.233858	0
-2.11798	0.234781	0
-2.1186	0.235708	0
-2.11922	0.236643	0
-2.11982	0.237594	0
-2.12041	0.238549	0
-2.12098	0.239504	0
-2.12154	0.240457	0
-2.12209	0.241419	0
-2.12262	0.242394	0
-2.12314	0.243383	0
-2.12364	0.244396	0
-2.12411	0.245434	0
-2.12453	0.24649	0
-2.12491	0.247568	0
-2.12524	0.248664	0
-2.12556	0.249785	0
-2.12586	0.250944	0
-2.12611	0.252154	0
-2.12629	0.253398	0
-2.12641	0.254666	0
-2.1265	0.255956	0
-2.12656	0.257267	0
-2.12656	0.258603	0
-2.1265	0.259951	0
-2.1264	0.261322	0
-2.12624	0.262714	0
-2.12603	0.264135	0
-2.1258	0.26559	0
-2.12555	0.267083	0
-2.12523	0.268601	0
-2.12483	0.270126	0
-2.12437	0.271651	0
-2.12391	0.273179	0
-2.12345	0.274703	0
-2.12298	0.276215	0
-2.12246	0.277705	0
-2.12188	0.279171	0
-2.12124	0.280618	0
-2.12054	0.282048	0
-2.11978	0.28346	0
-2.11896	0.284863	0
-2.1181	0.286262	0
-2.11719	0.28766	0
-2.11624	0.28906	0
-2.11525	0.290464	0
-2.11423	0.291872	0
-2.11316	0.293282	0
-2.11205	0.294695	0
-2.1109	0.296113	0
-2.10972	0.297533	0
-2.10851	0.298954	0
-2.10728	0.300376	0
-2.10602	0.301797	0
-2.10474	0.303223	0
-2.10344	0.304654	0
-2.10211	0.306083	0
-2.10076	0.307509	0
-2.09939	0.30893	0
-2.098	0.310348	0
-2.0966	0.311765	0
-2.09519	0.313185	0
-2.09377	0.314612	0
-2.09234	0.316047	0
-2.09089	0.31749	0
-2.08943	0.318937	0
-2.08798	0.320385	0
-2.08652	0.321833	0
-2.08506	0.32328	0
-2.08358	0.324727	0
-2.08209	0.326172	0
-2.08058	0.327616	0
-2.07906	0.329058	0
-2.07752	0.330505	0
-2.07597	0.331957	0
-2.07441	0.333415	0
-2.07286	0.334873	0
-2.0713	0.336332	0
-2.06973	0.337792	0
-2.06816	0.339248	0
-2.06659	0.3407	0
-2.06502	0.342153	0
-2.06346	0.343616	0
-2.0619	0.345092	0
-2.06035	0.346583	0
-2.05881	0.348089	0
-2.0573	0.349611	0
-2.05581	0.351146	0
-2.05432	0.352693	0
-2.05285	0.354248	0
-2.05138	0.355812	0
-2.04993	0.357385	0
-2.0485	0.358963	0
-2.04708	0.36054	0
-2.04567	0.36211	0
-2.04427	0.363672	0
-2.04289	0.36523	0
-2.04154	0.366781	0
-2.04021	0.368323	0
-2.03889	0.369854	0
-2.0376	0.371372	0
-2.03633	0.372871	0
-2.03508	0.374348	0
-2.03386	0.375812	0
-2.03264	0.377269	0
-2.03141	0.378722	0
-2.03015	0.38017	0
-2.02884	0.381605	0
-2.02751	0.383025	0
-2.02619	0.384431	0
-2.02489	0.385827	0
-2.02361	0.387219	0
-2.0223	0.388608	0
-2.02095	0.390001	0
-2.01959	0.391402	0
-2.01819	0.392807	0
-2.01677	0.394215	0
-2.01532	0.395629	0
-2.01384	0.39705	0
-2.01235	0.398485	0
-2.01085	0.399935	0
-2.00933	0.401404	0
-2.00779	0.402891	0
-2.00622	0.404395	0
-2.00461	0.405912	0
-2.00299	0.407445	0
-2.00136	0.408997	0
-1.99972	0.410568	0
-1.99806	0.412163	0
-1.99637	0.413782	0
-1.99465	0.415423	0
-1.9929	0.41708	0
-1.99113	0.418753	0
-1.98935	0.420444	0
-1.98756	0.422155	0
-1.98579	0.423887	0
-1.98402	0.425635	0
-1.98226	0.427396	0
-1.98052	0.429174	0
-1.97879	0.430969	0
-1.97707	0.432778	0
-1.97536	0.434594	0
-1.97366	0.436415	0
-1.97197	0.438233	0
-1.97031	0.440054	0
-1.96865	0.44187	0
-1.96701	0.443701	0
-1.96539	0.445531	0
-1.96382	0.447358	0
-1.96227	0.449197	0
-1.96077	0.451049	0
-1.95931	0.452917	0
-1.95787	0.454795	0
-1.95647	0.45668	0
-1.95511	0.458566	0
-1.95379	0.460452	0
-1.95252	0.462348	0
-1.95128	0.464261	0
-1.95005	0.466194	0
-1.9488	0.468141	0
-1.94756	0.4701	0
-1.94635	0.472078	0
-1.94519	0.474068	0
-1.94408	0.476076	0
-1.94302	0.47809	0
-1.94202	0.480101	0
-1.94104	0.482112	0
-1.94006	0.484128	0
-1.93911	0.486136	0
-1.93819	0.488128	0
-1.93723	0.490115	0
-1.93626	0.492088	0
-1.93529	0.494034	0
-1.93432	0.495973	0
-1.93335	0.497907	0
-1.93238	0.499839	0
-1.9314	0.501763	0
-1.93043	0.503675	0
-1.92948	0.505566	0
-1.92855	0.507426	0
-1.92766	0.509247	0
-1.9268	0.511043	0
-1.92597	0.512817	0
-1.92517	0.51457	0
-1.92441	0.516312	0
-1.92366	0.518041	0
-1.92295	0.519758	0
-1.92227	0.521462	0
-1.92164	0.523156	0
-1.92102	0.524836	0
-1.92041	0.526504	0
-1.91984	0.52816	0
-1.9193	0.529803	0
-1.91876	0.531431	0
-1.91822	0.533048	0
-1.91767	0.534652	0
-1.91713	0.536237	0
-1.9166	0.537817	0
-1.91608	0.539382	0
-1.91556	0.540926	0
-1.91505	0.542447	0
-1.91456	0.543949	0
-1.91408	0.545439	0
-1.91361	0.546918	0
-1.91316	0.54839	0
-1.91271	0.549854	0
-1.91227	0.55131	0
-1.91181	0.552757	0
-1.91136	0.554194	0
-1.91091	0.555625	0
-1.91043	0.557056	0
-1.90992	0.558482	0
-1.90937	0.559902	0
-1.90878	0.561313	0
-1.90818	0.56272	0
-1.90755	0.564127	0
-1.90687	0.565528	0
-1.90612	0.566919	0
-1.90534	0.5683	0
-1.90454	0.569669	0
-1.9037	0.571027	0
-1.90284	0.572379	0
-1.90196	0.573729	0
-1.90104	0.575064	0
-1.9001	0.576387	0
-1.89913	0.577715	0
-1.89813	0.579053	0
-1.89709	0.580403	0
-1.896	0.581762	0
-1.89487	0.583134	0
-1.89372	0.584515	0
-1.89254	0.585915	0
-1.89132	0.587325	0
-1.89002	0.588748	0
-1.88867	0.590189	0
-1.88724	0.591654	0
-1.88576	0.593138	0
-1.88424	0.59463	0
-1.88271	0.596148	0
-1.88115	0.59768	0
-1.87956	0.599224	0
-1.87793	0.600775	0
-1.87627	0.602334	0
-1.87458	0.603903	0
-1.87286	0.605476	0
-1.87112	0.607058	0
-1.86935	0.608648	0
-1.86753	0.61024	0
-1.86568	0.611844	0
-1.86378	0.613462	0
-1.86183	0.61509	0
-1.85981	0.616725	0
-1.85777	0.618369	0
-1.8557	0.620031	0
-1.85363	0.621705	0
-1.85154	0.623372	0
-1.84942	0.625021	0
-1.84727	0.626656	0
-1.84509	0.628282	0
-1.84286	0.629904	0
-1.84062	0.631527	0
-1.83839	0.633149	0
-1.8362	0.634777	0
-1.83403	0.636414	0
-1.83189	0.638058	0
-1.82974	0.6397	0
-1.82757	0.641326	0
-1.82538	0.642933	0
-1.82319	0.644519	0
-1.82099	0.646084	0
-1.81881	0.647631	0
-1.81665	0.649157	0
-1.81453	0.650667	0
-1.81244	0.652174	0
-1.81036	0.653685	0
-1.80827	0.655195	0
-1.80618	0.656711	0
-1.80408	0.658221	0
-1.80197	0.659727	0
-1.79984	0.661227	0
-1.7977	0.662724	0
-1.79557	0.664214	0
-1.79344	0.665686	0
-1.79131	0.667133	0
-1.78918	0.668563	0
-1.78704	0.669977	0
-1.7849	0.671377	0
-1.78277	0.672757	0
-1.78062	0.674121	0
-1.77846	0.675472	0
-1.77628	0.676808	0
-1.7741	0.678134	0
-1.77191	0.679445	0
-1.76972	0.680747	0
-1.76751	0.682043	0
-1.76528	0.683349	0
-1.76301	0.684656	0
-1.7607	0.685969	0
-1.75837	0.687283	0
-1.75604	0.688604	0
-1.7537	0.689935	0
-1.75134	0.691268	0
-1.74896	0.692604	0
-1.74653	0.693944	0
-1.74408	0.695277	0
-1.74161	0.696596	0
-1.73913	0.697912	0
-1.73664	0.699221	0
-1.73413	0.700546	0
-1.73161	0.70189	0
-1.72905	0.703251	0
-1.72646	0.704633	0
-1.72384	0.706037	0
-1.72119	0.707467	0
-1.71849	0.708918	0
-1.71575	0.710384	0
-1.71295	0.711859	0
-1.71013	0.713344	0
-1.7073	0.71484	0
-1.70444	0.71635	0
-1.70157	0.717879	0
-1.69867	0.719427	0
-1.69572	0.720996	0
-1.69272	0.722584	0
-1.68967	0.72419	0
-1.68659	0.72581	0
-1.68347	0.727437	0
-1.68031	0.729069	0
-1.67713	0.730709	0
-1.67393	0.732354	0
-1.6707	0.734006	0
-1.66744	0.735669	0
-1.66415	0.737344	0
-1.66081	0.739031	0
-1.65741	0.740729	0
-1.65396	0.74244	0
-1.65046	0.744164	0
-1.64692	0.745907	0
-1.64335	0.74767	0
-1.63976	0.74945	0
-1.63615	0.751243	0
-1.63254	0.753058	0
-1.62894	0.754894	0
-1.62534	0.756754	0
-1.62171	0.758635	0
-1.61804	0.760532	0
-1.61429	0.762438	0
-1.61048	0.764351	0
-1.60661	0.766269	0
-1.6027	0.768192	0
-1.59877	0.770118	0
-1.59481	0.772041	0
-1.59083	0.773958	0
-1.58682	0.775868	0
-1.58279	0.777772	0
-1.57872	0.779668	0
-1.57461	0.781555	0
-1.57044	0.783428	0
-1.56621	0.785288	0
-1.56194	0.78714	0
-1.55764	0.78899	0
-1.55332	0.790839	0
-1.54898	0.792688	0
-1.54461	0.794533	0
-1.54023	0.796374	0
-1.53582	0.79821	0
-1.53138	0.800044	0
-1.52691	0.80188	0
-1.52242	0.803717	0
-1.51791	0.805554	0
-1.51338	0.807391	0
-1.50883	0.809226	0
-1.50428	0.811057	0
-1.49971	0.812877	0
-1.49512	0.814688	0
-1.49052	0.816491	0
-1.48592	0.818285	0
-1.48132	0.820071	0
-1.47672	0.821844	0
-1.47211	0.823607	0
-1.46749	0.825363	0
-1.46286	0.827112	0
-1.45823	0.828855	0
-1.4536	0.830589	0
-1.44897	0.832317	0
-1.44434	0.834038	0
-1.43972	0.835756	0
-1.43512	0.837475	0
-1.43055	0.839197	0
-1.426	0.840925	0
-1.42145	0.842655	0
-1.41688	0.844385	0
-1.41224	0.846112	0
-1.40755	0.84783	0
-1.40282	0.849538	0
-1.39807	0.851232	0
-1.3933	0.852911	0
-1.38852	0.85458	0
-1.38372	0.856248	0
-1.37891	0.857921	0
-1.37407	0.859606	0
-1.3692	0.861306	0
-1.36428	0.863024	0
-1.35933	0.864763	0
-1.35434	0.866524	0
-1.34931	0.868302	0
-1.34424	0.87009	0
-1.33914	0.871884	0
-1.33401	0.873688	0
-1.32888	0.875507	0
-1.32375	0.877347	0
-1.31862	0.879211	0
-1.31351	0.8811	0
-1.3084	0.883011	0
-1.30329	0.884945	0
-1.29817	0.886895	0
-1.29305	0.888856	0
-1.28792	0.89082	0
-1.28277	0.892784	0
-1.27762	0.894749	0
-1.27247	0.896713	0
-1.26731	0.898684	0
-1.26216	0.900663	0
-1.25702	0.902657	0
-1.25187	0.904667	0
-1.24671	0.906694	0
-1.24155	0.908738	0
-1.23636	0.910802	0
-1.23116	0.912893	0
-1.22595	0.915002	0
-1.22072	0.917116	0
-1.21546	0.919229	0
-1.21021	0.921356	0
-1.20493	0.923498	0
-1.19961	0.925651	0
-1.19423	0.927816	0
-1.18882	0.929993	0
-1.18341	0.932174	0
-1.17798	0.934357	0
-1.17254	0.936545	0
-1.16706	0.938738	0
-1.16154	0.940933	0
-1.15598	0.943131	0
-1.15037	0.945337	0
-1.14473	0.947554	0
-1.13906	0.949787	0
-1.13337	0.952037	0
-1.12767	0.954295	0
-1.12196	0.956556	0
-1.11624	0.958813	0
-1.11049	0.961065	0
-1.10472	0.963312	0
-1.09894	0.965557	0
-1.09313	0.967804	0
-1.08732	0.970056	0
-1.08149	0.972311	0
-1.07566	0.974573	0
-1.06982	0.976836	0
-1.06398	0.9791	0
-1.05814	0.981364	0
-1.0523	0.98362	0
-1.04644	0.985865	0
-1.04057	0.988094	0
-1.03471	0.990309	0
-1.02884	0.99251	0
-1.02297	0.994699	0
-1.01711	0.996879	0
-1.01126	0.999048	0
-1.00542	1.00121	0
-0.9996	1.00337	0
-0.993802	1.00552	0
-0.988029	1.00767	0
-0.982285	1.00982	0
-0.976571	1.01197	0
-0.970891	1.0141	0
-0.965248	1.01623	0
-0.959639	1.01834	0
-0.954056	1.02044	0
-0.948499	1.02255	0
-0.942976	1.02466	0
-0.937481	1.02679	0
-0.931993	1.02893	0
-0.926494	1.03108	0
-0.921001	1.03324	0
-0.915521	1.03541	0
-0.910059	1.03758	0
-0.904619	1.03976	0
-0.899196	1.04194	0
-0.893793	1.04412	0
-0.888393	1.04633	0
-0.882986	1.04854	0
-0.877579	1.05077	0
-0.872175	1.05303	0
-0.866768	1.0553	0
-0.86135	1.05759	0
-0.855911	1.0599	0
-0.850447	1.06223	0
-0.844963	1.06457	0
-0.83947	1.06694	0
-0.83397	1.06934	0
-0.82846	1.07176	0
-0.822937	1.07422	0
-0.817399	1.07672	0
-0.811832	1.07926	0
-0.806224	1.08184	0
-0.800584	1.08444	0
-0.794948	1.08706	0
-0.789324	1.08974	0
-0.783695	1.09247	0
-0.778044	1.09525	0
-0.772397	1.0981	0
-0.766801	1.10103	0
-0.761286	1.10408	0
-0.755853	1.10726	0
-0.75046	1.11054	0
-0.745129	1.11395	0
-0.739839	1.11745	0
-0.734577	1.12103	0
-0.729325	1.12465	0
-0.724084	1.12831	0
-0.718858	1.13202	0
-0.713644	1.13576	0
-0.708438	1.13952	0
-0.703235	1.14329	0
-0.698038	1.14708	0
-0.69285	1.15085	0
-0.687638	1.15459	0
-0.682415	1.15831	0
-0.677187	1.162	0
-0.671941	1.16564	0
-0.666682	1.16926	0
-0.661413	1.17286	0
-0.656129	1.17642	0
-0.650823	1.17992	0
-0.645498	1.18332	0
-0.64016	1.18665	0
-0.634816	1.18993	0
-0.629462	1.19315	0
-0.624096	1.19632	0
-0.618727	1.19943	0
-0.613361	1.20249	0
-0.608004	1.20552	0
-0.602651	1.20854	0
-0.597299	1.21153	0
-0.591945	1.21452	0
-0.586588	1.2175	0
-0.581217	1.22045	0
-0.575834	1.22336	0
-0.570442	1.22623	0
-0.56504	1.22903	0
-0.559633	1.23177	0
-0.554223	1.23446	0
-0.548804	1.23709	0
-0.543367	1.23965	0
-0.537915	1.24213	0
-0.532446	1.24453	0
-0.526956	1.24681	0
-0.521443	1.24898	0
-0.515908	1.25106	0
-0.510355	1.25306	0
-0.504793	1.25499	0
-0.49923	1.25685	0
-0.493665	1.25864	0
-0.488094	1.26032	0
-0.48251	1.26193	0
-0.476909	1.26347	0
-0.4713	1.26496	0
-0.465688	1.2664	0
-0.460079	1.26776	0
-0.454475	1.26908	0
-0.448876	1.27034	0
-0.443292	1.27154	0
-0.437732	1.27268	0
-0.432193	1.27378	0
-0.426664	1.27486	0
-0.421151	1.27594	0
-0.415628	1.27697	0
-0.410087	1.27793	0
-0.404535	1.2788	0
-0.398972	1.27958	0
-0.3934	1.28029	0
-0.387821	1.28092	0
-0.382236	1.28148	0
-0.376649	1.28196	0
-0.371057	1.28236	0
-0.365463	1.2827	0
-0.359873	1.28295	0
-0.354303	1.28312	0
-0.348761	1.28321	0
-0.343222	1.28322	0
-0.337671	1.28309	0
-0.332104	1.28282	0
-0.32651	1.28242	0
-0.320881	1.28191	0
-0.315215	1.28134	0
-0.309507	1.2807	0
-0.303761	1.28002	0
-0.297975	1.27927	0
-0.292155	1.27845	0
-0.2863	1.27753	0
-0.280413	1.27654	0
-0.274489	1.27546	0
-0.268532	1.2743	0
-0.262539	1.27306	0
-0.256509	1.27174	0
-0.250455	1.27036	0
-0.244374	1.26891	0
-0.238262	1.26739	0
-0.232113	1.26582	0
-0.225929	1.26418	0
-0.219708	1.26246	0
-0.213462	1.26069	0
-0.207192	1.25885	0
-0.200899	1.25697	0
-0.194582	1.25504	0
-0.188241	1.25308	0
-0.181871	1.2511	0
-0.175471	1.24909	0
-0.169041	1.24707	0
-0.162591	1.24505	0
-0.15612	1.24302	0
-0.149624	1.241	0
-0.143104	1.23898	0
-0.136562	1.23693	0
-0.129998	1.23485	0
-0.123421	1.23275	0
-0.116835	1.23064	0
-0.110238	1.22851	0
-0.103631	1.22637	0
-0.0970125	1.22423	0
-0.090385	1.22206	0
-0.0837497	1.21986	0
-0.0770912	1.21764	0
-0.0704128	1.2154	0
-0.0637142	1.2131	0
-0.0569948	1.21075	0
-0.0502509	1.20837	0
-0.043488	1.20599	0
-0.0367136	1.20359	0
-0.0299367	1.20116	0
-0.0231595	1.19871	0
-0.0163947	1.19622	0
-0.00963903	1.1937	0
-0.00289035	1.19114	0
0.00385523	1.18854	0
0.0106032	1.18589	0
0.0173585	1.18321	0
0.0241109	1.18052	0
0.030863	1.1778	0
0.0376089	1.17505	0
0.0443564	1.17227	0
0.0511114	1.16945	0
0.0578724	1.1666	0
0.0646388	1.16373	0
0.07143	1.16079	0
0.0782454	1.15782	0
0.085077	1.15484	0
0.0919658	1.15181	0
0.0989087	1.14874	0
0.105877	1.14563	0
0.112859	1.14251	0
0.119858	1.13935	0
0.126858	1.13618	0
0.133858	1.13302	0
0.140868	1.12986	0
0.147896	1.12666	0
0.15493	1.12345	0
0.161969	1.12022	0
0.169049	1.11693	0
0.17615	1.11363	0
0.183256	1.11033	0
0.190363	1.10699	0
0.197463	1.10364	0
0.204555	1.10028	0
0.211628	1.09688	0
0.218686	1.09347	0
0.225732	1.09006	0
0.232761	1.08664	0
0.239776	1.0832	0
0.246776	1.07976	0
0.25376	1.0763	0
0.260776	1.07279	0
0.267835	1.06924	0
0.27493	1.06568	0
0.282072	1.06209	0
0.289259	1.05848	0
0.296485	1.05483	0
0.303729	1.05116	0
0.310988	1.04749	0
0.318254	1.04381	0
0.325516	1.04012	0
0.332769	1.03644	0
0.340005	1.03275	0
0.347225	1.02906	0
0.35443	1.02536	0
0.361616	1.02165	0
0.368783	1.01791	0
0.37592	1.01414	0
0.383028	1.01033	0
0.39011	1.00649	0
0.397163	1.00262	0
0.404182	0.998724	0
0.411169	0.994789	0
0.41812	0.990823	0
0.425041	0.986827	0
0.431935	0.982796	0
0.438803	0.978727	0
0.445648	0.974626	0
0.452462	0.970491	0
0.45924	0.966323	0
0.465985	0.962117	0
0.472699	0.957878	0
0.479395	0.953607	0
0.486073	0.949306	0
0.492731	0.94498	0
0.499369	0.940629	0
0.50599	0.936248	0
0.512591	0.931837	0
0.519168	0.927392	0
0.525722	0.922913	0
0.532253	0.9184	0
0.53876	0.913854	0
0.545248	0.909279	0
0.551713	0.904671	0
0.558157	0.900031	0
0.564577	0.895359	0
0.570971	0.890664	0
0.57735	0.88594	0
0.583715	0.881194	0
0.59007	0.876419	0
0.596416	0.871607	0
0.602754	0.866765	0
0.60909	0.861878	0
0.615418	0.856959	0
0.621723	0.852013	0
0.628042	0.847036	0
0.634369	0.842022	0
0.640695	0.836966	0
0.64702	0.831869	0
0.653366	0.826721	0
0.659722	0.82152	0
0.666052	0.816261	0
0.672356	0.810955	0
0.67864	0.805616	0
0.684896	0.800244	0
0.69111	0.794835	0
0.69729	0.789385	0
0.703465	0.783905	0
0.709637	0.7784	0
0.715807	0.772871	0
0.721981	0.767313	0
0.728166	0.761725	0
0.734357	0.756112	0
0.740559	0.750489	0
0.746774	0.744845	0
0.752991	0.739153	0
0.759213	0.733425	0
0.765434	0.72766	0
0.771658	0.72187	0
0.777883	0.716053	0
0.784108	0.710204	0
0.790335	0.704326	0
0.796561	0.698417	0
0.802787	0.69248	0
0.809029	0.686511	0
0.815295	0.680507	0
0.821579	0.674473	0
0.827886	0.668414	0
0.834217	0.66232	0
0.840569	0.656192	0
0.846942	0.650032	0
0.853344	0.643847	0
0.859775	0.637633	0
0.866232	0.63139	0
0.872708	0.625114	0
0.879217	0.618816	0
0.885729	0.612505	0
0.892227	0.606181	0
0.898725	0.599859	0
0.905238	0.593528	0
0.911751	0.58719	0
0.91826	0.580849	0
0.92477	0.574507	0
0.931281	0.568156	0
0.9378	0.561787	0
0.944331	0.555382	0
0.950867	0.548937	0
0.957411	0.542449	0
0.963959	0.535918	0
0.970518	0.529331	0
0.977076	0.522678	0
0.983633	0.515983	0
0.990198	0.509291	0
0.996769	0.502589	0
1.00334	0.495856	0
1.00993	0.489095	0
1.01655	0.482295	0
1.02321	0.475458	0
1.02989	0.468573	0
1.03657	0.461636	0
1.04325	0.454662	0
1.04995	0.447668	0
1.05668	0.440655	0
1.06343	0.433603	0
1.07019	0.426517	0
1.07697	0.419409	0
1.08378	0.412277	0
1.09062	0.405108	0
1.09749	0.39791	0
1.10436	0.390721	0
1.11123	0.38353	0
1.11811	0.376323	0
1.125	0.369078	0
1.13193	0.361784	0
1.13888	0.354441	0
1.14583	0.347078	0
1.15279	0.339692	0
1.15974	0.332272	0
1.16668	0.324792	0
1.17362	0.317237	0
1.18053	0.309608	0
1.18741	0.301922	0
1.19425	0.294211	0
1.20109	0.286488	0
1.20794	0.278738	0
1.21476	0.270936	0
1.22154	0.263077	0
1.22829	0.255165	0
1.23501	0.247175	0
1.24168	0.239119	0
1.24828	0.231033	0
1.25484	0.222945	0
1.26137	0.214831	0
1.26787	0.206676	0
1.27436	0.198453	0
1.28083	0.190144	0
1.28727	0.181774	0
1.29368	0.173332	0
1.30005	0.16482	0
1.30639	0.156249	0
1.31268	0.147636	0
1.31894	0.138982	0
1.32518	0.130272	0
1.33138	0.121513	0
1.33755	0.112692	0
1.34369	0.10382	0
1.34981	0.0948909	0
1.3559	0.0858869	0
1.36195	0.0768134	0
1.36795	0.0676732	0
1.37392	0.0585079	0
1.37985	0.0493144	0
1.38572	0.0400607	0
1.39155	0.030758	0
1.39734	0.0214333	0
1.4031	0.0120994	0
1.40881	0.00275004	0
1.41448	-0.00663041	0
1.42011	-0.016046	0
1.42574	-0.0254965	0
1.43136	-0.0349633	0
1.43701	-0.044442	0
1.44269	-0.0539243	0
1.44841	-0.0633985	0
1.45418	-0.0728498	0
1.45999	-0.0823034	0
1.46583	-0.0917861	0
1.47168	-0.101304	0
1.47756	-0.110863	0
1.48348	-0.120452	0
1.48942	-0.13005	0
1.49539	-0.139647	0
1.50138	-0.149247	0
1.50739	-0.158858	0
1.51341	-0.168479	0
1.51944	-0.178122	0
1.5255	-0.187788	0
1.53157	-0.197479	0
1.53768	-0.207197	0
1.54382	-0.216943	0
1.55	-0.226713	0
1.55623	-0.236498	0
1.56251	-0.246301	0
1.56883	-0.256132	0
1.57519	-0.265997	0
1.58159	-0.275897	0
1.58802	-0.285833	0
1.59449	-0.295805	0
1.60097	-0.305815	0
1.60747	-0.315858	0
1.61398	-0.325942	0
1.62048	-0.336055	0
1.62696	-0.346214	0
1.63342	-0.356422	0
1.63986	-0.366683	0
1.64628	-0.377006	0
1.6527	-0.387395	0
1.65911	-0.39786	0
1.66553	-0.408395	0
1.67195	-0.418995	0
1.67837	-0.429653	0
1.68478	-0.440362	0
1.69117	-0.451127	0
1.69752	-0.46195	0
1.70384	-0.472837	0
1.71014	-0.483783	0
1.7164	-0.494784	0
1.72263	-0.50582	0
1.72884	-0.516883	0
1.73502	-0.527974	0
1.74116	-0.5391	0
1.74726	-0.550277	0
1.75333	-0.561513	0
1.75937	-0.572803	0
1.7654	-0.584124	0
1.77143	-0.59547	0
1.77746	-0.60684	0
1.78349	-0.618233	0
1.78953	-0.629642	0
1.79557	-0.64106	0
1.80159	-0.652491	0
1.80759	-0.663949	0
1.81356	-0.675433	0
1.81951	-0.686938	0
1.82544	-0.698449	0
1.83136	-0.709976	0
1.83727	-0.721506	0
1.84318	-0.73304	0
1.84909	-0.744593	0
1.855	-0.756181	0
1.86092	-0.76782	0
1.86687	-0.779517	0
1.87287	-0.791285	0
1.87893	-0.803117	0
1.88503	-0.814986	0
1.89117	-0.826865	0
1.89734	-0.838726	0
1.90354	-0.850572	0
1.90976	-0.862435	0
1.916	-0.874345	0
1.92226	-0.886333	0
1.92858	-0.898388	0
1.93494	-0.910504	0
1.94135	-0.92268	0
1.94779	-0.934901	0
1.95427	-0.947157	0
1.96077	-0.959426	0
1.96732	-0.971697	0
1.97389	-0.983971	0
1.9805	-0.996253	0
1.98715	-1.00855	0
1.99382	-1.02087	0
2.00052	-1.03321	0
2.00724	-1.04557	0
2.01397	-1.05794	0
2.02073	-1.0703	0
2.0275	-1.08266	0
2.03429	-1.09501	0
2.04111	-1.10735	0
2.04796	-1.11972	0
2.05483	-1.13213	0
2.06172	-1.14458	0
2.06864	-1.15706	0
2.07559	-1.16955	0
2.08257	-1.18204	0
2.08956	-1.19453	0
2.09654	-1.20704	0
2.1035	-1.21957	0
2.11043	-1.23213	0
2.11732	-1.24473	0
2.12417	-1.25734	0
2.13099	-1.26995	0
2.1378	-1.28254	0
2.14459	-1.29516	0
2.15136	-1.3078	0
2.15809	-1.32047	0
2.16479	-1.33315	0
2.17144	-1.34584	0
2.17805	-1.35854	0
2.18462	-1.37129	0
2.19114	-1.38409	0
2.19762	-1.39692	0
2.2041	-1.40975	0
2.21055	-1.42258	0
2.21698	-1.43541	0
2.22339	-1.44823	0
2.22975	-1.46103	0
2.23609	-1.47381	0
2.24237	-1.48657	0
2.2486	-1.49933	0
2.2548	-1.51209	0
2.26095	-1.52486	0
2.26703	-1.53762	0
2.27308	-1.55037	0
2.27908	-1.56309	0
2.28505	-1.5758	0
2.29098	-1.58849	0
2.29687	-1.60115	0
2.30274	-1.61378	0
2.30858	-1.62639	0
2.31439	-1.63898	0
2.32015	-1.65157	0
2.32589	-1.66414	0
2.3316	-1.67671	0
2.33726	-1.68929	0
2.34288	-1.70188	0
2.34846	-1.71447	0
2.35401	-1.72705	0
2.35953	-1.73965	0
2.36502	-1.75224	0
2.37047	-1.76484	0
2.37588	-1.77747	0
2.38124	-1.79015	0
2.38655	-1.8029	0
2.39182	-1.81571	0
2.39704	-1.82857	0
2.40224	-1.84146	0
2.40742	-1.85439	0
2.41259	-1.86735	0
2.41776	-1.88037	0
2.42294	-1.89345	0
2.42811	-1.9066	0
2.43327	-1.91983	0
2.43844	-1.93314	0
2.44359	-1.94653	0
2.44875	-1.96	0
2.45389	-1.97355	0
2.45903	-1.98718	0
2.46416	-2.00086	0
2.46929	-2.01459	0
2.47443	-2.02836	0
2.47957	-2.04218	0
2.48472	-2.05605	0
2.48987	-2.06999	0
2.49503	-2.08398	0
2.50018	-2.09803	0
2.50533	-2.11212	0
2.51048	-2.12627	0
2.51562	-2.14047	0
2.52076	-2.15471	0
2.52592	-2.16899	0
2.53109	-2.18329	0
2.53628	-2.19763	0
2.54148	-2.21202	0
2.54671	-2.22644	0
2.55194	-2.24091	0
2.55719	-2.25543	0
2.56243	-2.26998	0
2.56768	-2.28458	0
2.57293	-2.29922	0
2.57817	-2.3139	0
2.58341	-2.32861	0
2.58865	-2.34333	0
2.59389	-2.35809	0
2.59909	-2.3729	0
2.60428	-2.38777	0
2.60947	-2.40267	0
2.61465	-2.41762	0
2.6198	-2.43263	0
2.62493	-2.44774	0
2.63002	-2.46297	0
2.63508	-2.47832	0
2.64013	-2.49377	0
2.64516	-2.50928	0
2.65019	-2.52486	0
2.6552	-2.54051	0
2.66019	-2.55624	0
2.66515	-2.57206	0
2.67007	-2.58797	0
2.67496	-2.60398	0
2.67982	-2.6201	0
2.68465	-2.63631	0
2.68946	-2.65262	0
2.69427	-2.669	0
2.69906	-2.68546	0
2.70385	-2.70199	0
2.70861	-2.71859	0
2.71336	-2.73528	0
2.71808	-2.75203	0
2.72277	-2.76884	0
2.72744	-2.7857	0
2.73209	-2.80263	0
2.73672	-2.81963	0
2.74134	-2.8367	0
2.74595	-2.85383	0
2.75056	-2.87102	0
2.75517	-2.88826	0
2.75976	-2.90555	0
2.76434	-2.92287	0
2.76891	-2.94023	0
2.77346	-2.95763	0
2.77799	-2.97507	0
2.78252	-2.99254	0
2.78703	-3.01004	0
2.79154	-3.02756	0
2.79603	-3.04511	0
2.80051	-3.06269	0
2.80499	-3.08031	0
2.80948	-3.09799	0
2.81397	-3.11572	0
2.81848	-3.13349	0
2.82301	-3.15131	0
2.82755	-3.16917	0
2.83212	-3.1871	0
2.83671	-3.2051	0
2.84132	-3.22319	0
2.84597	-3.24135	0
2.85067	-3.25955	0
2.8554	-3.2778	0
2.86018	-3.29607	0
2.86501	-3.3144	0
2.86987	-3.33279	0
2.87478	-3.35126	0
2.87971	-3.3698	0
2.88468	-3.38843	0
2.88967	-3.40713	0
2.89469	-3.42589	0
2.89974	-3.4447	0
2.90483	-3.46355	0
2.90995	-3.48245	0
2.91512	-3.50139	0
2.92031	-3.52039	0
2.92554	-3.53944	0
2.9308	-3.55856	0
2.93609	-3.57774	0
2.9414	-3.59699	0
2.94674	-3.6163	0
2.95211	-3.63565	0
2.9575	-3.65506	0
2.96291	-3.67451	0
2.96836	-3.69403	0
2.97383	-3.71361	0
2.97935	-3.73325	0
2.9849	-3.75297	0
2.99048	-3.77275	0
2.9961	-3.79261	0
3.00174	-3.81255	0
3.0074	-3.83254	0
3.01309	-3.8526	0
3.0188	-3.87274	0
3.02452	-3.89298	0
3.03026	-3.91335	0
3.03602	-3.93382	0
3.04182	-3.95436	0
3.04764	-3.97496	0
3.05348	-3.9956	0
3.05934	-4.0163	0
3.0652	-4.03707	0
3.07106	-4.0579	0
3.07692	-4.07881	0
3.08276	-4.09979	0
3.0886	-4.12085	0
3.09443	-4.14198	0
3.10025	-4.16316	0
3.10608	-4.18439	0
3.11192	-4.20564	0
3.11777	-4.22691	0
3.12363	-4.2482	0
3.12949	-4.2695	0
3.13534	-4.29082	0
3.14117	-4.31216	0
3.14699	-4.33352	0
3.15281	-4.35488	0
3.15863	-4.37625	0
3.16444	-4.39762	0
3.17025	-4.419	0
3.17606	-4.44038	0
3.18187	-4.46175	0
3.18768	-4.48313	0
3.19348	-4.50452	0
3.19928	-4.52591	0
3.20508	-4.54732	0
3.21086	-4.56874	0
3.21664	-4.59019	0
3.22242	-4.61165	0
3.22819	-4.63313	0
3.23396	-4.65463	0
3.23972	-4.67617	0
3.24546	-4.69774	0
3.25116	-4.71936	0
3.25684	-4.74103	0
3.26249	-4.76274	0
3.2681	-4.7845	0
3.27366	-4.80633	0
3.27919	-4.82822	0
3.28466	-4.85018	0
3.29011	-4.8722	0
3.29552	-4.89427	0
3.30091	-4.91639	0
3.30626	-4.93855	0
3.31156	-4.96076	0
3.31681	-4.98301	0
3.322	-5.00531	0
3.32713	-5.02765	0
3.3322	-5.05004	0
3.33722	-5.07245	0
3.34218	-5.09489	0
3.3471	-5.11734	0
3.35198	-5.13981	0
3.3568	-5.16231	0
3.36156	-5.18481	0
3.36627	-5.20732	0
3.37089	-5.22983	0
3.37544	-5.25234	0
3.3799	-5.27484	0
3.38429	-5.29734	0
3.38859	-5.31984	0
3.39282	-5.34235	0
3.39698	-5.36485	0
3.40107	-5.38734	0
3.40507	-5.40981	0
3.409	-5.43226	0
3.41287	-5.45469	0
3.4167	-5.47712	0
3.42048	-5.49955	0
3.42421	-5.52197	0
3.42791	-5.54439	0
3.43157	-5.56681	0
3.43522	-5.58922	0
3.43883	-5.61162	0
3.44237	-5.63402	0
3.44587	-5.65642	0
3.44935	-5.67881	0
3.45277	-5.7012	0
3.45618	-5.72357	0
3.45957	-5.74591	0
3.46295	-5.76822	0
3.46635	-5.79051	0
3.46974	-5.81277	0
3.4731	-5.83502	0
3.47642	-5.85725	0
3.47971	-5.87947	0
3.48298	-5.90166	0
3.48623	-5.92382	0
3.48944	-5.94595	0
3.49262	-5.96805	0
3.49574	-5.99012	0
3.49883	-6.01215	0
3.50187	-6.03416	0
3.50484	-6.05613	0
3.50775	-6.07808	0
3.51059	-6.1	0
3.51338	-6.12189	0
3.5161	-6.14375	0
3.51874	-6.16558	0
3.52131	-6.18739	0
3.52379	-6.20919	0
3.52618	-6.23097	0
3.52848	-6.25274	0
3.53071	-6.27449	0
3.53285	-6.29624	0
3.53489	-6.318	0
3.53683	-6.33977	0
3.53865	-6.36158	0
3.54038	-6.38342	0
3.54206	-6.40529	0
3.54371	-6.42717	0
3.54534	-6.44906	0
3.54692	-6.47099	0
3.54845	-6.49295	0
3.5499	-6.51497	0
3.5513	-6.53703	0
3.55262	-6.55914	0
3.5539	-6.58129	0
3.55513	-6.60349	0
3.5563	-6.62574	0
3.55745	-6.64802	0
3.55857	-6.67033	0
3.55966	-6.69268	0
3.56068	-6.71506	0
3.56165	-6.73747	0
3.56258	-6.75991	0
3.56345	-6.7824	0
3.56425	-6.80492	0
3.56499	-6.82747	0
3.56567	-6.85004	0
3.5663	-6.87263	0
3.56685	-6.89524	0
3.56734	-6.91787	0
3.56776	-6.94051	0
3.56812	-6.96317	0
3.56843	-6.98584	0
3.56867	-7.00853	0
3.56884	-7.03126	0
3.56894	-7.05403	0
3.56899	-7.07684	0
3.569	-7.09968	0
3.56896	-7.12255	0
3.56887	-7.14543	0
3.56872	-7.16834	0
3.56849	-7.19126	0
3.5682	-7.21421	0
3.56784	-7.23716	0
3.56739	-7.26014	0
3.56685	-7.28313	0
3.56625	-7.30614	0
3.5656	-7.32919	0
3.56491	-7.35228	0
3.56416	-7.37541	0
3.56334	-7.39856	0
3.56245	-7.42175	0
3.56149	-7.44496	0
3.56046	-7.46819	0
3.55939	-7.49144	0
3.55825	-7.51469	0
3.55707	-7.53796	0
3.55583	-7.56124	0
3.55453	-7.58453	0
3.55316	-7.60783	0
3.55168	-7.63115	0
3.55011	-7.65447	0
3.54848	-7.67781	0
3.54681	-7.70114	0
3.5451	-7.72446	0
3.54335	-7.74777	0
3.54156	-7.77108	0
3.53972	-7.79439	0
3.53785	-7.8177	0
3.53595	-7.841	0
3.53401	-7.86429	0
3.53204	-7.88758	0
3.53004	-7.91087	0
3.52799	-7.93415	0
3.52592	-7.95741	0
3.52381	-7.98066	0
3.52168	-8.00389	0
3.51952	-8.02712	0
3.51732	-8.05033	0
3.51509	-8.07354	0
3.51282	-8.09673	0
3.51053	-8.1199	0
3.5082	-8.14305	0
3.50584	-8.16619	0
3.50342	-8.18932	0
3.50095	-8.21244	0
3.49842	-8.23555	0
3.49583	-8.25866	0
3.49318	-8.28174	0
3.49049	-8.30481	0
3.48777	-8.32787	0
3.485	-8.35092	0
3.48216	-8.37398	0
3.47927	-8.39702	0
3.47632	-8.42007	0
3.4733	-8.44312	0
3.47016	-8.46618	0
3.4669	-8.48926	0
3.46358	-8.51235	0
3.46019	-8.53546	0
3.45674	-8.55858	0
3.45322	-8.5817	0
3.44961	-8.60484	0
3.44592	-8.62799	0
3.44215	-8.65117	0
3.43831	-8.67438	0
3.43439	-8.69764	0
3.4304	-8.72093	0
3.42633	-8.74427	0
3.42221	-8.76764	0
3.41802	-8.79106	0
3.41379	-8.81451	0
3.40949	-8.83799	0
3.40513	-8.86151	0
3.40071	-8.88504	0
3.39625	-8.90859	0
3.39174	-8.93215	0
3.3872	-8.95573	0
3.38262	-8.97932	0
3.37799	-9.00293	0
3.37331	-9.02655	0
3.3686	-9.05019	0
3.36385	-9.07385	0
3.35907	-9.09754	0
3.35425	-9.12125	0
3.34942	-9.14497	0
3.34456	-9.16871	0
3.33965	-9.19246	0
3.3347	-9.21623	0
3.3297	-9.23999	0
3.32466	-9.26377	0
3.31957	-9.28755	0
3.31444	-9.31135	0
3.30928	-9.33515	0
3.30408	-9.35897	0
3.29882	-9.38279	0
3.2935	-9.40662	0
3.28813	-9.43045	0
3.28272	-9.4543	0
3.27726	-9.47815	0
3.27173	-9.502	0
3.26612	-9.52584	0
3.26044	-9.54967	0
3.2547	-9.57349	0
3.24891	-9.5973	0
3.24309	-9.6211	0
3.23722	-9.64488	0
3.2313	-9.66864	0
3.2253	-9.69238	0
3.21923	-9.7161	0
3.21311	-9.73981	0
3.20694	-9.76349	0
3.20073	-9.78716	0
3.19448	-9.81081	0
3.18818	-9.83444	0
3.18182	-9.85804	0
3.17541	-9.88163	0
3.16894	-9.90518	0
3.16242	-9.9287	0
3.15585	-9.9522	0
3.14924	-9.97567	0
3.14258	-9.99912	0
3.13587	-10.0225	0
3.12911	-10.0459	0
3.12231	-10.0693	0
3.11547	-10.0927	0
3.1086	-10.116	0
3.10169	-10.1393	0
3.09475	-10.1626	0
3.08777	-10.1859	0
3.08076	-10.2091	0
3.07371	-10.2324	0
3.06662	-10.2556	0
3.0595	-10.2788	0
3.05234	-10.302	0
3.04514	-10.3252	0
3.0379	-10.3483	0
3.03062	-10.3715	0
3.0233	-10.3946	0
3.01595	-10.4177	0
3.00857	-10.4408	0
3.00114	-10.4638	0
2.99365	-10.4869	0
2.98609	-10.51	0
2.97846	-10.533	0
2.97076	-10.5561	0
2.963	-10.5792	0
2.95516	-10.6023	0
2.94724	-10.6254	0
2.93925	-10.6485	0
2.9312	-10.6716	0
2.92309	-10.6947	0
2.91492	-10.7178	0
2.90668	-10.741	0
2.89837	-10.7642	0
2.88999	-10.7874	0
2.88155	-10.8107	0
2.87303	-10.834	0
2.86445	-10.8573	0
2.8558	-10.8807	0
2.84708	-10.9041	0
2.83828	-10.9275	0
2.82943	-10.9509	0
2.82052	-10.9743	0
2.81156	-10.9978	0
2.80256	-11.0212	0
2.79352	-11.0447	0
2.78442	-11.0682	0
